# Supplementary material for: Ligand-based pharmacophore modeling and molecular dynamic simulation approaches to identify putative MMP-9 inhibitors
Source: PubMed Central journal article supplement — RSC Adv. 2021 Aug 6;11(43):26820–31. doi: 10.1039/d1ra03891e (PMC9037691; doi:10.1039/d1ra03891e), 2021-08-06
Supplement: RA-011-D1RA03891E-s001.pdf [file RA-011-D1RA03891E-s001.pdf]

### Supplementary Data

Table S1. Chemical structures for the data set of 67 compounds with corresponding  $pIC_{50}$  values.

| Compound | Structure                                                                          | IC <sub>50</sub><br>( $\mu$ M) | $pIC_{50}$ | Predicted activity | Residual Factor | References              |
|----------|------------------------------------------------------------------------------------|--------------------------------|------------|--------------------|-----------------|-------------------------|
| 1        | 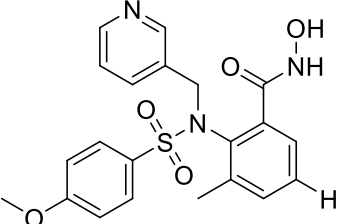  | 0.005                          | 8.30103    | 7.60352            | -0.697507       | J. Levin, et al., 2001; |
| 2        |   | 0.024                          | 7.619789   | 7.70339            | 0.0835988       | J. Levin, et al., 2001; |
| 3        |  | 0.015                          | 7.823909   | 7.68744            | -0.136468       | J. Levin, et al., 2001; |

|   |                                                                                     |       |          |         |           |                         |
|---|-------------------------------------------------------------------------------------|-------|----------|---------|-----------|-------------------------|
| 4 | 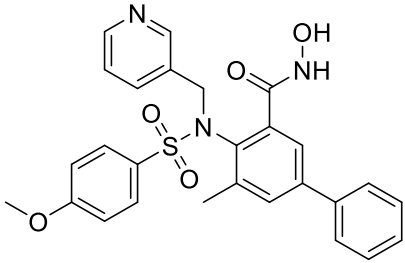   | 0.003 | 8.522879 | 8.5737  | 0.0508204 | J. Levin, et al., 2001; |
| 5 |    | 0.001 | 9        | 8.78496 | -0.215042 | J. Levin, et al., 2001; |
| 6 |   | 0.002 | 8.69897  | 8.80159 | 0.102623  | J. Levin, et al., 2001; |
| 7 |  | 0.005 | 8.30103  | 8.35062 | 0.0495947 | J. Levin, et al., 2001; |

|    |  |       |          |         |           |                         |
|----|--|-------|----------|---------|-----------|-------------------------|
| 8  |  | 0.002 | 8.69897  | 7.99622 | -0.70275  | J. Levin, et al., 2001; |
| 9  |  | 0.007 | 8.154902 | 8.19562 | 0.0407221 | J. Levin, et al., 2001; |
| 10 |  | 0.008 | 8.09691  | 7.82786 | -0.269048 | J. Levin, et al., 2001; |

|    |  |       |          |         |            |                         |
|----|--|-------|----------|---------|------------|-------------------------|
| 11 |  | 0.144 | 6.841638 | 6.91105 | 0.0694115  | J. Levin, et al., 2001; |
| 12 |  | 0.554 | 6.25649  | -       | -          | J. Levin, et al., 2001; |
| 13 |  | 0.046 | 7.337242 | 7.25829 | -0.0789566 | J. Levin, et al., 2001; |
| 14 |  | 0.004 | 8.39794  | 8.1804  | -0.217541  | J. Levin, et al., 2001; |

|               |                                                                                    |       |          |         |           |                         |
|---------------|------------------------------------------------------------------------------------|-------|----------|---------|-----------|-------------------------|
| 15            | 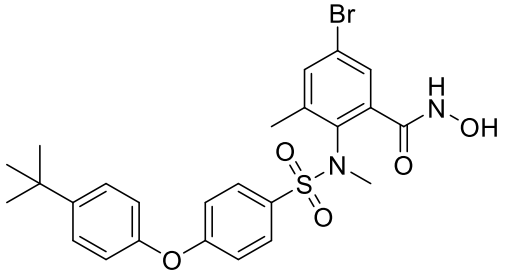  | 0.125 | 6.90309  | 6.9712  | 0.0681133 | J. Levin, et al., 2001; |
| 16            |   | 0.007 | 8.154902 | 8.11264 | -0.042267 | J. Levin, et al., 2001; |
| <sup>17</sup> |  | 0.153 | 6.815309 | 6.63392 | -0.181385 | J. Levin, et al., 2001; |

|               |                                                                                    |       |          |         |           |                         |
|---------------|------------------------------------------------------------------------------------|-------|----------|---------|-----------|-------------------------|
| <sup>18</sup> | 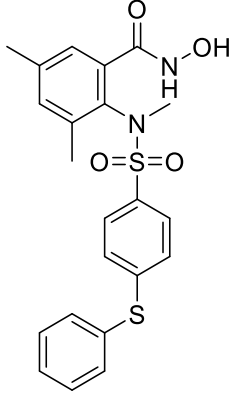  | 0.008 | 8.09691  | 7.71709 | -0.379818 | J. Levin, et al., 2001; |
| <sup>19</sup> |   | 0.152 | 6.818156 | 6.557   | -0.261154 | J. Levin, et al., 2001; |
| 20            |  | 3.448 | 5.462433 | 5.58179 | 0.119359  | J. Levin, et al., 2001; |

|     |                                                                                    |       |          |         |            |                         |
|-----|------------------------------------------------------------------------------------|-------|----------|---------|------------|-------------------------|
| 21  | 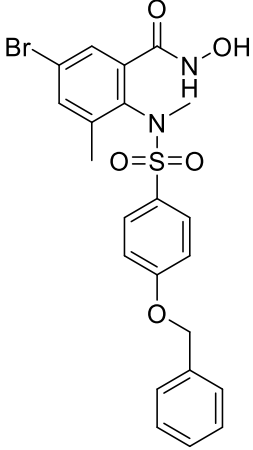  | 0.189 | 6.723538 | 6.6892  | -0.0343412 | J. Levin, et al., 2001; |
| '22 |  | 0.232 | 6.634512 | 6.65487 | 0.020357   | J. Levin, et al., 2001; |

|    |                                                                                     |         |          |         |           |                         |
|----|-------------------------------------------------------------------------------------|---------|----------|---------|-----------|-------------------------|
| 23 | 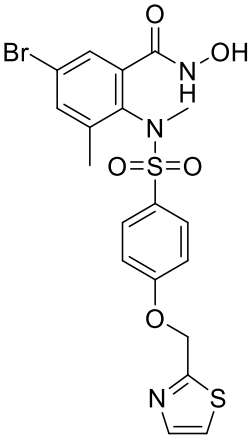   | 0.952   | 6.021363 | 6.12075 | 0.0993916 | J. Levin, et al., 2001; |
| 24 |    | 0.59004 | 6.229119 | 6.4716  | 0.242483  | Omar et al., 2020       |
| 25 |    | 0.10582 | 6.975432 | 6.83941 | -0.13602  | Omar et al., 2020       |
| 26 |  | 0.07611 | 7.118558 | 6.39433 | -0.724229 | Omar et al., 2020       |



|                 |                                                                                    |         |          |         |             |                   |
|-----------------|------------------------------------------------------------------------------------|---------|----------|---------|-------------|-------------------|
| <sup>t</sup> 27 | 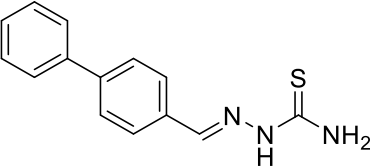  | 0.09434 | 7.025304 | 7.09946 | 0.0741556   | Omar et al., 2020 |
| <sup>t</sup> 28 |   | 0.10917 | 6.961897 | 6.95577 | -0.00612625 | Omar et al., 2020 |
| 29              |   | 0.35890 | 6.445027 | 6.68998 | 0.24495     | Omar et al., 2020 |
| <sup>t</sup> 30 |   | 0.02093 | 7.679231 | 7.32964 | -0.349596   | Omar et al., 2020 |
| 31              |  | 0.02877 | 7.54106  | 7.40491 | -0.13615    | Omar et al., 2020 |

|    |                                                                                     |         |          |         |            |                   |
|----|-------------------------------------------------------------------------------------|---------|----------|---------|------------|-------------------|
| 32 | 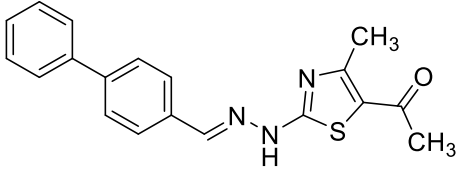   | 0.13807 | 6.859901 | 6.81372 | -0.0461788 | Omar et al., 2020 |
| 33 |    | 0.13792 | 6.860373 | 6.94409 | 0.0837131  | Omar et al., 2020 |
| 34 |    | 0.03860 | 7.413413 | 7.44445 | 0.0310361  | Omar et al., 2020 |
| 35 |   | 0.06233 | 7.205303 | -       | -          | Omar et al., 2020 |
| 36 |  | 0.08605 | 7.065249 | 7.25206 | 0.186812   | Omar et al., 2020 |

|                 |                                                                                     |         |          |         |           |                   |
|-----------------|-------------------------------------------------------------------------------------|---------|----------|---------|-----------|-------------------|
| 37              | 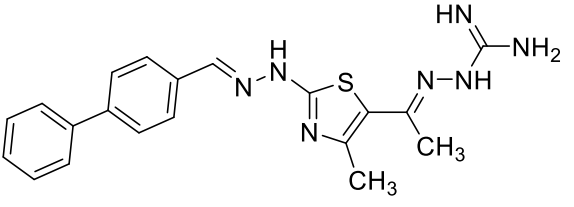   | 0.05687 | 7.245117 | 7.37439 | 0.129269  | Omar et al., 2020 |
| 38              |    | 0.06433 | 7.191586 | 7.45972 | 0.268132  | Omar et al., 2020 |
| 39              |    | 0.00714 | 8.146302 | 7.9581  | -0.188206 | Shi et al., 2012  |
| 40              |    | 0.00725 | 8.139662 | -       | -         | Shi et al., 2012  |
| <sup>t</sup> 41 |   | 0.00728 | 8.137869 | 7.6597  | -0.478091 | Shi et al., 2012  |
| <sup>t</sup> 42 |  | 0.00528 | 8.277366 | 7.83931 | -0.438057 | Shi et al., 2012  |

|                 |                                                                                     |         |          |         |           |                     |
|-----------------|-------------------------------------------------------------------------------------|---------|----------|---------|-----------|---------------------|
| 43              | 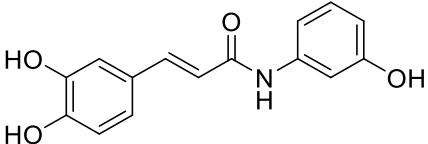   | 1.64227 | 5.784555 | 6.4691  | 0.684549  | Shi et al.,<br>2012 |
| <sup>t</sup> 44 |    | 0.00235 | 8.628932 | 7.90856 | -0.720371 | Shi et al.,<br>2012 |
| 45              |    | 0.00567 | 8.246417 | 8.51253 | 0.266114  | Shi et al.,<br>2012 |
| 46              |    | 1.63242 | 5.787168 | -       | -         | Shi et al.,<br>2012 |
| 47              |   | 0.00333 | 8.477556 | 8.57493 | 0.0973757 | Shi et al.,<br>2012 |
| 48              |  | 0.00591 | 8.228413 | 7.23113 | -0.997286 | Shi et al.,<br>2012 |

|                 |                                                                                     |         |          |         |           |                     |
|-----------------|-------------------------------------------------------------------------------------|---------|----------|---------|-----------|---------------------|
| <sup>t</sup> 49 | 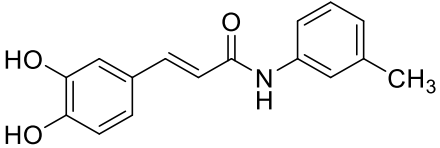   | 1.75385 | 5.756008 | 6.56691 | 0.180902  | Shi et al.,<br>2012 |
| <sup>t</sup> 50 |    | 0.00364 | 8.438899 | 8.13051 | -0.308392 | Shi et al.,<br>2012 |
| 51              |    | 0.00781 | 8.107349 | 8.18479 | 0.0774371 | Shi et al.,<br>2012 |
| 52              |    | 1.86959 | 5.728254 | -       | -         | Shi et al.,<br>2012 |
| 53              |   | 0.00729 | 8.137272 | 7.07264 | -1.06464  | Shi et al.,<br>2012 |
| 54              |  | 0.00819 | 8.086716 | 8.28299 | -0.196272 | Shi et al.,<br>2012 |

|    |                                                                                     |         |          |         |            |                         |
|----|-------------------------------------------------------------------------------------|---------|----------|---------|------------|-------------------------|
| 55 | 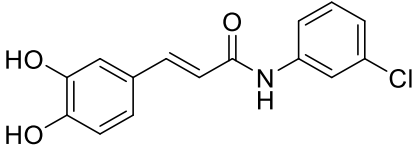   | 1.92113 | 5.716443 | 6.55879 | 0.842346   | Shi et al.,<br>2012     |
| 56 |    | 0.00789 | 8.102923 | 8.1758  | 0.072873   | Shi et al.,<br>2012     |
| 57 |    | 2.1     | 5.677781 | 5.6568  | -0.0209825 | C. Chen et<br>al., 2019 |
| 58 |   | 3.5     | 5.455932 | 5.20299 | -0.252947  | C. Chen et<br>al., 2019 |
| 59 |  | 3.2     | 5.49485  | 5.71479 | 0.219938   | C. Chen et<br>al., 2019 |

|    |                                                                                    |      |          |         |            |                      |
|----|------------------------------------------------------------------------------------|------|----------|---------|------------|----------------------|
| 60 | 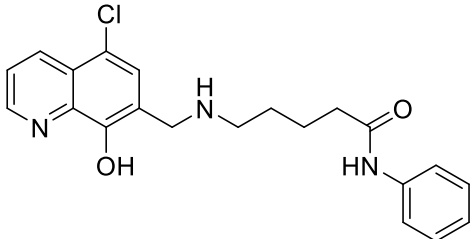  | 3.6  | 5.443697 | 5.35485 | -0.0888422 | C. Chen et al., 2019 |
| 61 |   | 0.66 | 6.180456 | 6.38792 | 0.207467   | C. Chen et al., 2019 |
| 62 |   | 1.3  | 5.886057 | 5.75928 | -0.12678   | C. Chen et al., 2019 |
| 63 |  | 3.1  | 5.508638 | -       | -          | C. Chen et al., 2019 |

|                 |                                                                                    |     |          |         |           |                      |
|-----------------|------------------------------------------------------------------------------------|-----|----------|---------|-----------|----------------------|
| 64              | 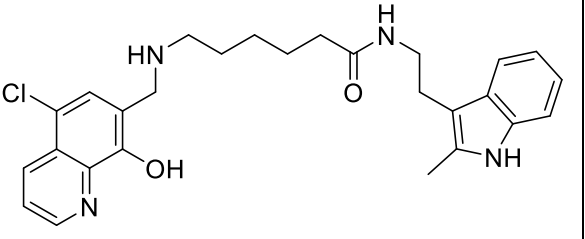  | 1.7 | 5.769551 | -       | -         | C. Chen et al., 2019 |
| <sup>t</sup> 65 |   | 5.1 | 5.29243  | 5.95646 | 0.664032  | C. Chen et al., 2019 |
| <sup>t</sup> 66 |   | 6.0 | 5.221849 | 6.0173  | 0.79545   | C. Chen et al., 2019 |
| 67              |  | 5.3 | 5.275724 | 5.13355 | -0.142178 | C. Chen et al., 2019 |

t: test ligands



**Table S2a.** Angles between different sites of model DDHRR\_1.

| <b>Site1</b> | <b>Site2</b> | <b>Site3</b> | <b>Angles<br/>(Å)</b> |
|--------------|--------------|--------------|-----------------------|
| H9           | R13          | R14          | 68.0                  |
| H9           | D7           | R14          | 37.4                  |
| D8           | R13          | H9           | 21.8                  |
| D8           | D7           | R14          | 58.8                  |
| R13          | D8           | R14          | 34.7                  |
| H9           | D7           | R14          | 83.7                  |

**Table S2b.** Distances between different sites of model DDHRR\_1.

| <b>Site 1</b> | <b>Site 2</b> | <b>Distance<br/>(Å)</b> |
|---------------|---------------|-------------------------|
| H9            | R13           | 2.89                    |
| R13           | R14           | 6.19                    |
| D8            | H9            | 5.85                    |
| D7            | D8            | 2.09                    |
| R14           | D7            | 4.70                    |
| R14           | D8            | 4.93                    |
| H8            | D7            | 7.69                    |

|    |     |      |
|----|-----|------|
| D8 | R13 | 3.53 |
| H8 | R14 | 6.67 |

**Table S3.** Results of Y-Scrambling method

| <b>Model</b> | <b>R</b> | <b>R<sup>2</sup></b> |
|--------------|----------|----------------------|
| Original     | 0.504724 | 0.254747             |
| Random 1     | 0.324377 | 0.10522              |
| Random 2     | 0.417006 | 0.173894             |
| Random 3     | 0.285357 | 0.081428             |
| Random 4     | 0.306254 | 0.093791             |
| Random 5     | 0.27919  | 0.077947             |
| Random 6     | 0.226197 | 0.051165             |
| Random 7     | 0.162422 | 0.026381             |
| Random 8     | 0.396729 | 0.157394             |
| Random 9     | 0.176174 | 0.031037             |
| Random 10    | 0.334835 | 0.112115             |

**Random Model Parameters**

Average r: 0.290854

Average  $r^2$ : 0.091037

Average  $Q^2$ : -0.18697

cRp<sup>2</sup>: 0.208195

**Table S4.** Results of Xternal Validation Plus 1.1 tool using mean absolute error-based criteria.

| <b>User Input File Information</b>                                      | <b>File Name</b>          | <b>Values</b> |
|-------------------------------------------------------------------------|---------------------------|---------------|
| Model biasness test                                                     | nPE/nNE                   | 1.7632        |
|                                                                         | nNE/nPE                   | 0.5672        |
|                                                                         | MPE/MNE                   | 1.1445        |
|                                                                         | MNE/MPE                   | 0.8738        |
|                                                                         | AAE-   AE                 | 0.2669        |
|                                                                         | R <sup>2</sup>            | 0.8936        |
| Error-based metric<br>(after removing 5%<br>data with high<br>residues) | MAE (95%<br>data)         | 0.3734        |
|                                                                         | MAE+3×SD<br>(95% data)    | 1.1394        |
| Threshold values<br>utilized to judge the<br>model predictions          | 0.1×training set<br>range | 0.7820        |
|                                                                         | 0.15×training set         | 1.1729        |

|                                                        |                            |        |
|--------------------------------------------------------|----------------------------|--------|
|                                                        | range                      |        |
|                                                        | 0.2×training set<br>range  | 1.5639 |
|                                                        | 0.25×training set<br>range | 1.9549 |
| Result (MAE-based<br>criteria applied on 95<br>% data) | Prediction<br>quality      | GOOD   |

**Table S5.** Molecular docking results (kcal/mol) of phase data set ligands **1-67** showing interacting amino acids.

| S. No | <sup>a</sup> Gscore | <sup>b</sup> GvdW | <sup>c</sup> Genergy | <sup>d</sup> Gemodel | <sup>e</sup> Gecolumb |
|-------|---------------------|-------------------|----------------------|----------------------|-----------------------|
| 1     | -4.493              | -35.663           | -41.291              | -48.185              | -5.628                |
| 2     | -6.087              | -41.593           | -46.242              | -67.45               | -4.649                |
| 3     | -4.779              | -34.092           | -41.765              | -55.184              | -7.673                |
| 4     | -4.389              | -39.805           | -46.79               | -61.051              | -6.985                |
| 5     | -8.414              | -43.328           | -51.7                | -72.803              | -8.373                |
| 6     | -5.401              | -49.594           | -53.257              | -74.4                | -3.663                |
| 7     | -4.389              | -36.927           | -41.84               | -55.63               | -4.913                |
| 8     | -2.791              | -41.163           | -46.258              | -60.254              | -5.096                |
| 9     | -4.132              | -34.412           | -40.397              | -52.98               | -5.985                |
| 10    | -3.526              | -36.049           | -45.256              | -60.5                | -9.207                |

|    |        |         |         |         |         |
|----|--------|---------|---------|---------|---------|
| 11 | -4.751 | -44.741 | -45.189 | -65.173 | -0.448  |
| 12 | -7.195 | -44.505 | -55.486 | -82.218 | -10.981 |
| 13 | -6.799 | -52.335 | -60.828 | -94.659 | -8.493  |
| 14 | -7.265 | -45.047 | -55.406 | -78.652 | -10.359 |
| 15 | -6.312 | -57.287 | -64.482 | -73.201 | -7.195  |
| 16 | -5.912 | -50.396 | -57.617 | -83.664 | -7.222  |
| 17 | -6.166 | -52.536 | -61.48  | -88.346 | -8.944  |
| 18 | -5.095 | -52.904 | -59.001 | -81.513 | -6.098  |
| 19 | -6.787 | -53.252 | -58.153 | -82.969 | -4.9    |
| 20 | -7.343 | -54.414 | -56.25  | -80.945 | -1.836  |
| 21 | -5.936 | -52.24  | -61.083 | -96.14  | -8.844  |
| 22 | -4.584 | -54.017 | -64.018 | -95.315 | -10.001 |
| 23 | -3.851 | -56.463 | -65.78  | -98.708 | -9.318  |
| 24 | -6.563 | -33.545 | -38.952 | -48.513 | -5.407  |
| 25 | -7.532 | -34.057 | -43.193 | -59.701 | -9.136  |
| 26 | -5.5   | -29.901 | -36.838 | -51.539 | -6.937  |
| 27 | -7.702 | -41.849 | -45.831 | -69.613 | -3.982  |
| 28 | -5.954 | -34.965 | -39.445 | -41.239 | -4.481  |
| 29 | -6.846 | -46.413 | -48.655 | -68.093 | -2.242  |
| 30 | -7.682 | -48.108 | -52.637 | -68.972 | -4.53   |
| 31 | -7.761 | -37.77  | -45.449 | -71.019 | -7.679  |

|    |        |         |         |         |        |
|----|--------|---------|---------|---------|--------|
| 32 | -6.842 | -51.294 | -53.614 | -83.242 | -2.32  |
| 33 | -6.973 | -44.881 | -48.464 | -59.131 | -3.583 |
| 34 | -6.448 | -45.367 | -51.147 | -74.571 | -5.78  |
| 35 | -7.553 | -55.159 | -59.287 | -73.504 | -4.128 |
| 36 | -7.62  | -48.417 | -54.541 | -74.375 | -6.124 |
| 37 | -7.223 | -54.469 | -56.358 | -93.305 | -1.889 |
| 38 | -7.067 | -54.874 | -59.57  | -76.49  | -4.697 |
| 39 | -7.178 | -42.102 | -44.041 | -67.234 | -1.939 |
| 40 | -7.476 | -41.425 | -44.614 | -62.875 | -3.189 |
| 41 | -7.454 | -43.286 | -48.655 | -70.255 | -5.37  |
| 42 | -7.816 | -40.961 | -47.845 | -72.853 | -6.884 |
| 43 | -7.531 | -40.808 | -48.562 | -75.11  | -7.754 |
| 44 | -8.072 | -43.635 | -51.677 | -78.469 | -8.042 |
| 45 | -6.927 | -46.31  | -48.802 | -64.097 | -2.492 |
| 46 | -6.701 | -45.752 | -48.664 | -69.289 | -2.913 |
| 47 | -7.611 | -44.315 | -49.863 | -72.365 | -5.548 |
| 48 | -6.765 | -43.78  | -46.752 | -65.176 | -2.972 |
| 49 | -6.759 | -44.079 | -46.503 | -63.753 | -2.424 |
| 50 | -6.782 | -44.506 | -46.912 | -66.459 | -2.405 |
| 51 | -6.891 | -42.269 | -44.507 | -61.136 | -2.238 |
| 52 | -7.229 | -42.317 | -44.162 | -65.048 | -1.846 |

|    |        |         |         |         |         |
|----|--------|---------|---------|---------|---------|
| 53 | -7.016 | -43.541 | -47.713 | -64.85  | -4.172  |
| 54 | -6.979 | -45.279 | -47.737 | -63.676 | -2.457  |
| 55 | -7.301 | -45.105 | -48.33  | -68.302 | -3.226  |
| 56 | -7.036 | -45.035 | -47.4   | -68.71  | -2.366  |
| 57 | -6.84  | -42.235 | -49.306 | -70.372 | -7.071  |
| 58 | -7.507 | -45.853 | -53.795 | -80.82  | -7.942  |
| 59 | -8.023 | -44.255 | -53.776 | -80.301 | -9.521  |
| 60 | -8.504 | -46.704 | -58.246 | -87.615 | -11.542 |
| 61 | -8.33  | -51.345 | -61.586 | -91.363 | -10.241 |
| 62 | -5.16  | -38.282 | -46.498 | -64.594 | -8.216  |
| 63 | -7.175 | -45.89  | -48.729 | -68.25  | -2.84   |
| 64 | -7.629 | -43.939 | -50.158 | -72.322 | -6.219  |
| 65 | -7.108 | -46.161 | -50.501 | -71.562 | -4.34   |
| 66 | -5.072 | -26.841 | -45.035 | -61.459 | -5.194  |
| 67 | -7.749 | -52.571 | -56.506 | -71.758 | -3.935  |

<sup>a</sup>glide score; <sup>b</sup>glide Van der Waal; <sup>c</sup>glide energy; <sup>d</sup>glide Emodel; <sup>e</sup>glide Ecolumb.

**Table S6.** Binding free energy (MM-GBSA) calculation (kcal/mol) of data set ligands **1-67**.

| S. No | <sup>a</sup> $\Delta G_{bind}$ | <sup>b</sup> $\Delta G_{coul}$ | <sup>c</sup> $\Delta G_{cov}$ | <sup>c</sup> $\Delta G_{Hbond}$ | <sup>d</sup> $\Delta G_{lipo}$ | <sup>e</sup> $\Delta G_{solvGB}$ | <sup>f</sup> $\Delta G_{vdw}$ |
|-------|--------------------------------|--------------------------------|-------------------------------|---------------------------------|--------------------------------|----------------------------------|-------------------------------|
| 1     | -53.49                         | -19.71                         | 11.21                         | -1.1                            | -15.94                         | 16.16                            | -41.6                         |

|    |        |        |       |       |        |       |        |
|----|--------|--------|-------|-------|--------|-------|--------|
| 2  | -60.11 | -24.26 | 2.6   | -3.11 | -16.72 | 21.41 | -38.06 |
| 3  | -57.42 | -30.75 | 11.19 | -2.46 | -15.14 | 24.55 | -42.93 |
| 4  | -79.64 | -67.22 | 15.85 | -2.75 | -25.23 | 49.3  | -48.34 |
| 5  | -92.2  | -56.01 | 8.81  | -2.81 | -24.24 | 43.22 | -61.03 |
| 6  | -55.88 | -23.36 | 9.49  | -1.61 | -21.91 | 34.61 | -45.61 |
| 7  | -68.38 | -62.77 | 11.4  | -2.9  | -20.76 | 48.97 | -43.29 |
| 8  | -43.18 | -20.38 | 9.68  | -2.05 | -19    | 34.7  | -45.38 |
| 9  | -56.58 | -36.83 | 8.16  | -2.43 | -17.54 | 27.06 | -31.14 |
| 10 | -56.07 | -29.68 | -1.62 | -2.95 | -12.01 | 20.83 | -30.35 |
| 11 | -66.39 | -14.76 | 11.63 | -2.4  | -19.86 | 13.37 | -51.88 |
| 12 | -68.42 | -27.05 | 14.9  | -2.41 | -26.21 | 31.15 | -54.2  |
| 13 | -75.95 | -27.03 | 17.98 | -1.43 | -30.89 | 26.73 | -57.73 |
| 14 | -73.12 | -20.14 | 9.53  | -2.68 | -25.34 | 24.76 | -54.44 |
| 15 | -87.69 | -25.88 | 5.43  | -1.44 | -32.2  | 30.03 | -61.62 |
| 16 | -74.19 | -36.21 | 4.43  | -3.44 | -22.58 | 32.65 | -47.16 |
| 17 | -74.58 | -10.2  | -0.82 | -2.74 | -22.32 | 15.22 | -51.28 |
| 18 | -76.46 | -37.23 | 5.09  | -2.59 | -26.68 | 34.65 | -47.79 |
| 19 | -76.12 | -11.02 | 10.29 | -2.33 | -26.48 | 19.04 | -61.4  |
| 20 | -82.12 | -47.98 | 8.04  | -3.79 | -28.01 | 45.45 | -55.12 |
| 21 | -73.34 | -33.07 | 11.38 | -1.49 | -28.26 | 33.1  | -53.99 |
| 22 | -75.48 | -24.53 | 7.92  | -1.43 | -27.22 | 28.42 | -57.27 |



|    |        |        |       |       |        |       |        |
|----|--------|--------|-------|-------|--------|-------|--------|
| 23 | -59.96 | -0.8   | 3.32  | -1.89 | -18.72 | 15.9  | -54.77 |
| 24 | -56.43 | -19.33 | 2.8   | -0.43 | -15.24 | 18.62 | -42.77 |
| 25 | -57.81 | -37.06 | 9.08  | -3.09 | -17.83 | 30.28 | -38.62 |
| 26 | -50.35 | -22.95 | 2.55  | -2.02 | -11.24 | 20.24 | -37.09 |
| 27 | -71.31 | -45.56 | 2.47  | -2.77 | -24.08 | 36.33 | -36.41 |
| 28 | -51.03 | -14.49 | 4.35  | -1.18 | -14.84 | 20.78 | -43.51 |
| 29 | -63.5  | -5.95  | 6.4   | -1.21 | -17.81 | 15.71 | -58.99 |
| 30 | -61.92 | -13.67 | 9.8   | -1.08 | -18.32 | 14.85 | -51.78 |
| 31 | -69.54 | -57.1  | 14.58 | -3.36 | -16.03 | 32    | -39.49 |
| 32 | -64.85 | -11.15 | 5.42  | 0.26  | -26.68 | 21.55 | -52.5  |
| 33 | -56.83 | -12.27 | 11.2  | -0.9  | -19.92 | 19.44 | -52.29 |
| 34 | -67.88 | -15.53 | 4.92  | -1.68 | -20.73 | 5.59  | -36.64 |
| 35 | -66.57 | -6.48  | 14.88 | -0.14 | -24.71 | 18.44 | -66.3  |
| 36 | -80.78 | -45.16 | 12.37 | -2.42 | -25.77 | 41.47 | -60.47 |
| 37 | -75.33 | -16.72 | 12.61 | -1.92 | -30.73 | 25.88 | -62.76 |
| 38 | -81.97 | -15.48 | 10.13 | -1.86 | -25.21 | 7.17  | -54.91 |
| 39 | -67.36 | -19.01 | 3.57  | -0.52 | -26.26 | 26.76 | -50.23 |
| 40 | -54.54 | -18.38 | 10.51 | -0.36 | -26.85 | 27.28 | -45.29 |
| 41 | -66.97 | -34.67 | 2.71  | -1.41 | -27.41 | 35.01 | -39.62 |
| 42 | -57.05 | -13.89 | 7.41  | -1.25 | -25.36 | 21.71 | -45.67 |
| 43 | -67.58 | -59.98 | 6.66  | -1.56 | -25.09 | 55.7  | -43.76 |

|    |        |        |       |       |        |       |        |
|----|--------|--------|-------|-------|--------|-------|--------|
| 44 | -72.78 | -17.06 | 4.76  | -0.89 | -27.94 | 21.55 | -51.73 |
| 45 | -64.88 | -11.91 | 8.1   | -1    | -27.96 | 26.76 | -58.1  |
| 46 | -59.6  | -6.22  | -2.6  | 0.49  | -27.48 | 25.64 | -48.77 |
| 47 | -69.38 | -29.71 | 11.61 | -0.65 | -29.63 | 31.42 | -49.53 |
| 48 | -63.49 | -34.39 | 11.03 | -2.08 | -27.26 | 36.43 | -45.02 |
| 49 | -72.69 | -34.96 | 8.63  | -1.16 | -28.35 | 33.15 | -48.79 |
| 50 | -69.8  | -21.03 | 3.77  | -0.59 | -27.73 | 29.32 | -51.85 |
| 51 | -60.66 | -12.71 | 3.72  | -0.52 | -25.88 | 27.05 | -50.98 |
| 52 | -65.21 | -21.74 | 4.74  | -0.98 | -27.12 | 30.31 | -49.03 |
| 53 | -65.12 | -5.59  | 3.99  | -0.06 | -27.83 | 17.33 | -51.37 |
| 54 | -60.69 | -16.38 | 6     | -0.84 | -26.48 | 28.4  | -51.18 |
| 55 | -67.88 | -28.43 | 4.94  | -0.72 | -27.6  | 32.03 | -46.73 |
| 56 | -73.3  | -29.17 | 5.01  | -1.03 | -27.99 | 30.03 | -48.65 |
| 57 | -75.4  | -29.22 | 5.01  | -1.96 | -25.4  | 25.3  | -48.48 |
| 58 | -67.12 | -21.17 | 11.41 | -0.68 | -24.95 | 27.56 | -54.82 |
| 59 | -70.74 | -29.72 | 8.91  | -1.79 | -25.15 | 33.16 | -53.16 |
| 60 | -80.37 | -44.57 | 9.85  | -3.15 | -25.64 | 39.43 | -53.7  |
| 61 | -80.39 | -28.29 | 8.15  | -2.19 | -25.79 | 27.69 | -56.98 |
| 62 | -42.23 | -22.74 | 7.06  | -2.37 | -16.27 | 30.71 | -35.64 |
| 63 | -64.96 | -19.14 | 12.19 | -2.14 | -27.63 | 29.23 | -54.91 |
| 64 | -47.56 | -17.52 | 3.41  | -2.41 | -18.8  | 28.63 | -41.43 |

|    |        |        |       |       |        |       |        |
|----|--------|--------|-------|-------|--------|-------|--------|
| 65 | -62.76 | -21.2  | 8.11  | -2.06 | -23.71 | 24.32 | -48.11 |
| 66 | -75.51 | -38.71 | 10.06 | -1.79 | -27.38 | 39.17 | -54.27 |
| 67 | -62.53 | -24.47 | 8.44  | -2.43 | -22.32 | 29.21 | -50.62 |

<sup>a</sup>Free energy of binding; <sup>b</sup>Coulomb energy; <sup>c</sup>Covalent energy (internal energy); <sup>d</sup>hydrogen bonding energy; <sup>e</sup>hydrophobic energy (nonpolar contribution estimated by solvent accessible surface area); <sup>f</sup>electrostatic solvation energy; <sup>g</sup>van der Waals energy.

**Table S7.** Count and percentage of actives in top N% of decoy results.

| <b>% Decoys</b>  | <b>1 %</b> | <b>2 %</b> | <b>5 %</b> | <b>10 %</b> | <b>20 %</b> |
|------------------|------------|------------|------------|-------------|-------------|
| <b># Actives</b> | 7          | 7          | 7          | 7           | 7           |
| <b>% Actives</b> | 70.0       | 70.0       | 70.0       | 70.0        | 70.0        |

**Table S8.** Count and percentage of actives in top N% of results.

| <b>% Results</b> | <b>1 %</b> | <b>2 %</b> | <b>5 %</b> | <b>10 %</b> | <b>20 %</b> |
|------------------|------------|------------|------------|-------------|-------------|
| <b># Actives</b> | 7          | 7          | 7          | 7           | 7           |
| <b>% Actives</b> | 70.0       | 70.0       | 70.0       | 70.0        | 70.0        |

**Table S9.** Enrichment Factors with respect to N% sample sizes.

| <b>% Samples</b> | <b>1 %</b> | <b>2 %</b> | <b>5 %</b> | <b>10 %</b> | <b>20 %</b> |
|------------------|------------|------------|------------|-------------|-------------|
| <b>EF</b>        | 71         | 35         | 14         | 7           | 3.5         |
| <b>EF*</b>       | 70         | 35         | 14         | 7           | 3.5         |

|            |         |       |       |      |       |
|------------|---------|-------|-------|------|-------|
| <b>EF'</b> | 1.3e+02 | 67    | 27    | 14   | 7     |
| <b>EFF</b> | 0.972   | 0.944 | 0.867 | 0.75 | 0.556 |

EF: Enrichment factor (Number of ranked results for which to calculate the enrichment factor);

EF\*: Enrichment factor (Number of ranked decoys for which to calculate the enrichment

factor); EF': Enrichment factor Prime; EFF: Active recovery Efficiency.

**Table S10.** Hydrogen bond occupancy compound 5/5I12 complex.

| Amino acid residue | Hydrogen bond occupancy (%) |
|--------------------|-----------------------------|
| Tyr179             | 56%                         |
| Leu188             | 72%                         |
| Ala189             | 79%                         |
| His190             | 46%                         |
| His191             | 49%                         |
| Phe192             | 39%                         |
| Glu227             | 25%                         |

**Table S11.** Table showing docking results, binding free energy (kcal/mol) and predicted activity of pharmacophore generated virtual hits in the catalytic pocket of MMP-9 enzyme (PDB:5I12).

| Title                 | Compound                                                                            | <sup>a</sup> G <sub>score</sub> | <sup>b</sup> ΔG <sub>bind</sub> | Predicted activity | Molecular Properties |                   |                      |                       |                                  |
|-----------------------|-------------------------------------------------------------------------------------|---------------------------------|---------------------------------|--------------------|----------------------|-------------------|----------------------|-----------------------|----------------------------------|
|                       |                                                                                     |                                 |                                 |                    | <sup>c</sup> M.W     | <sup>d</sup> SASA | <sup>e</sup> DonorHB | <sup>f</sup> AcceptHB | <sup>g</sup> LogP <sub>o/w</sub> |
| CACPD2011a-0002144822 | 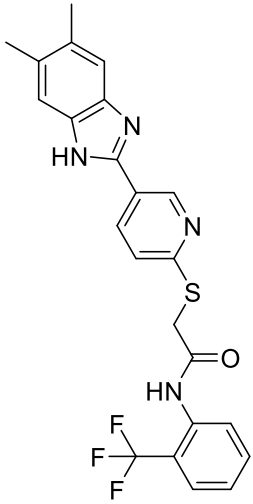  | -10.967                         | -68.65                          | 7.963              | 456.485              | 766.666           | 2.000                | 5.000                 | 5.789                            |
| CACPD2011a-0000241403 |  | -9.948                          | -62.97                          | 7.562              | 283.347              | 559.609           | 1.000                | 4.500                 | 2.969                            |

|                       |                                                                                   |        |        |       |         |         |       |       |       |
|-----------------------|-----------------------------------------------------------------------------------|--------|--------|-------|---------|---------|-------|-------|-------|
| CACPD2011a-0000542004 | 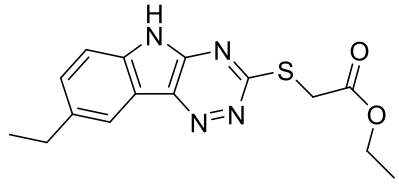 | -9.642 | -59.63 | 7.589 | 316.377 | 619.899 | 1.000 | 5.000 | 2.994 |
| CACPD2011a-0001461212 |  | -9.685 | -55.76 | 6.825 | 382.762 | 647.010 | 2.000 | 5.500 | 3.069 |
| CACPD2011a-0000963808 |  | -9.56  | -42.29 | 6.845 | 368.837 | 650.274 | 4.000 | 8.200 | 0.946 |

<sup>a</sup>glide score; <sup>b</sup>Free energy of binding; <sup>c</sup>M.W: Molecular Weight; <sup>d</sup>SASA: Solvent accessible surface area (300-1000); <sup>e</sup>DonorHB: Total number of hydrogen bonds of the molecules that are to be donated to water molecules of solvent (0.0-6.0); <sup>f</sup>AcceptorHB: Total number of hydrogen bonds of the ligands to be accepted by from the water molecules of solvent (2.0-20.0); <sup>g</sup>QPLogP<sub>O/W</sub>: Predicted octanol/water partition coefficient (-2 to 6.5).

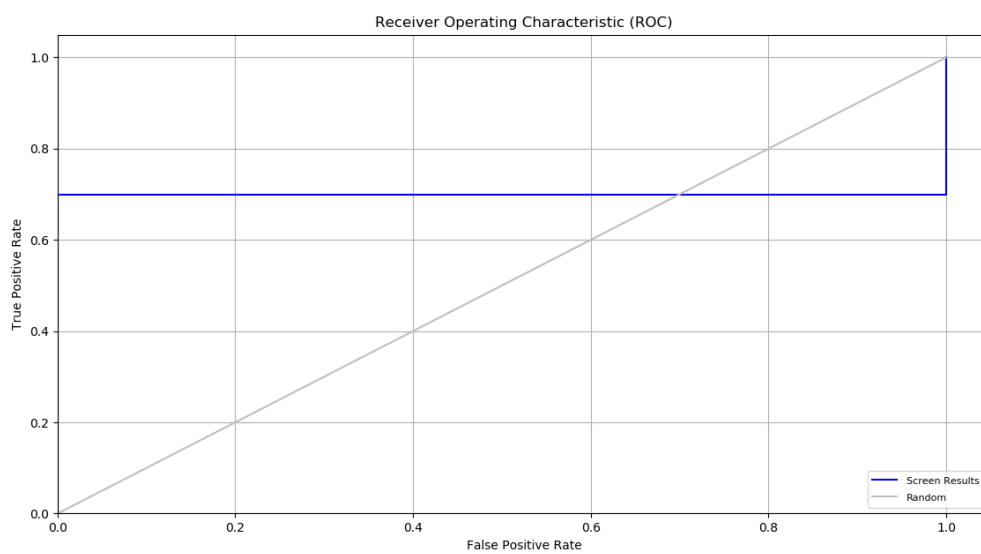

**Figure S1.** ROC curve obtained by DDHRR\_1 model against randomly curve.

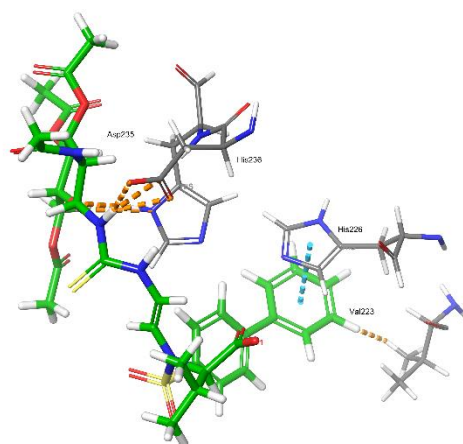

**Figure S2.** Represents three-dimensional diagram of cocystal/5I12 complex

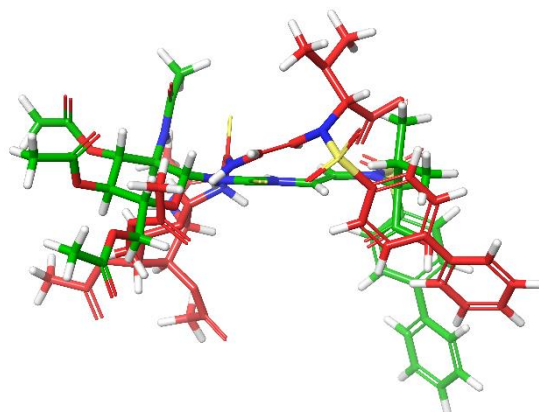

**Figure S3.** Represents superposition of conformations of cocystal (red) and best XP-docking pose (Green)

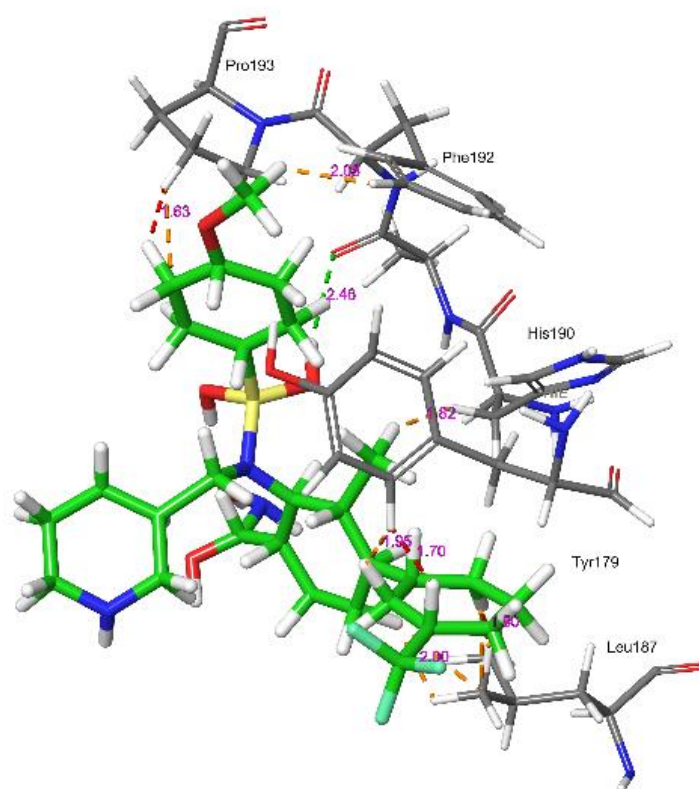

**Figure S4.** Represents three-dimensional diagram of compound 5/5I12 complex



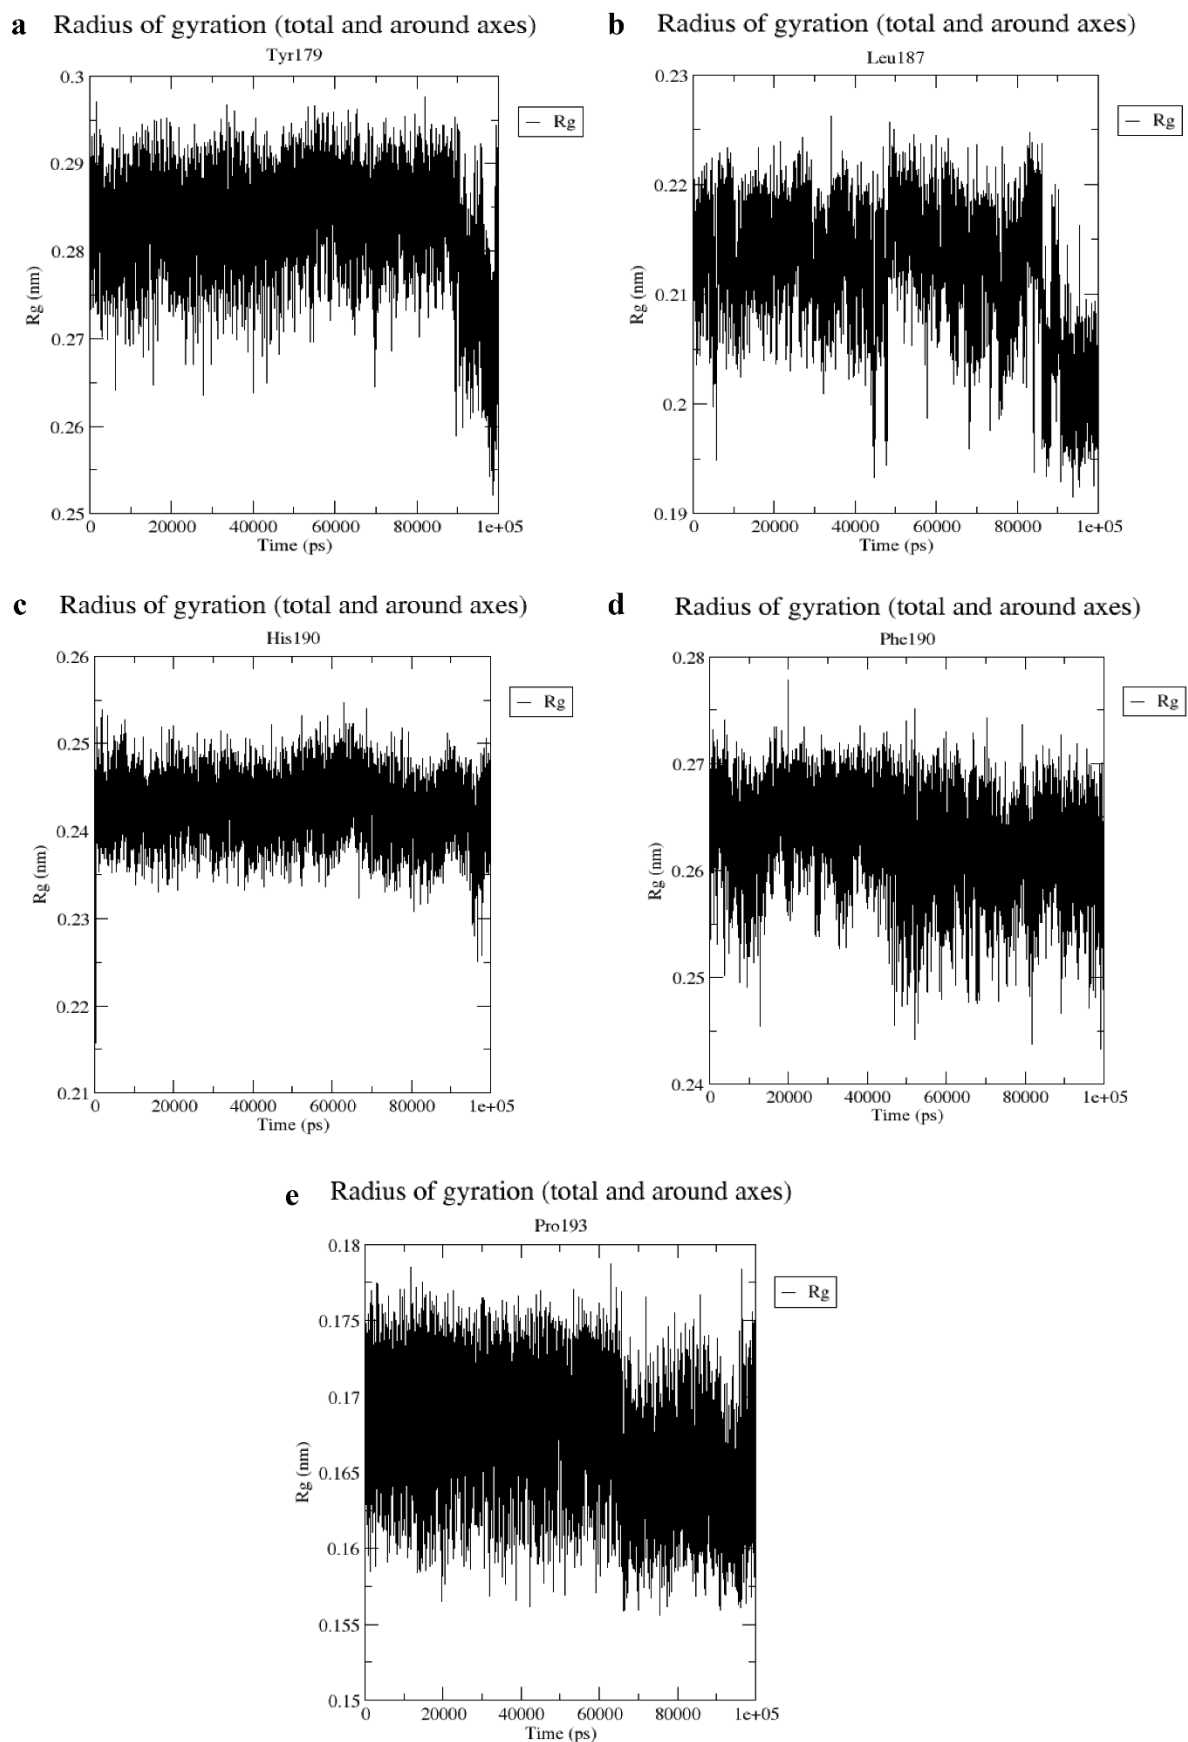

**Figure S5.** Radius of gyration of (a) Tyr179 (b) Leu187 (c) His190 (d) Phe192 (e) Pro193 5/5I12 complex for 100 ns MD simulation trajectory

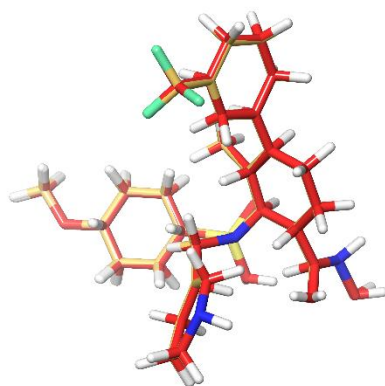

**Figure S6.** Represents superposition of **5** snapshots at 10 ns intervals from the 50 ns MD simulation trajectory.

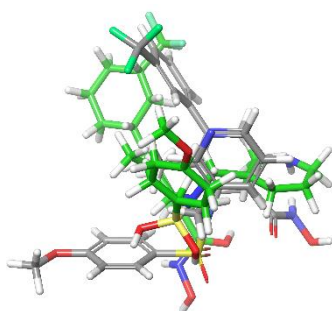

**Figure S7.** Represents superposition of conformations of inhibitor **5** after MD simulation (Green) and best XP- docking pose (Grey)

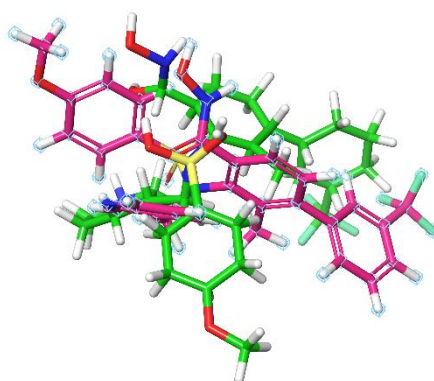

**Figure S8.** Represents superposition of conformations of inhibitor **5** after MD simulation (Green) and pose of the pharmacophore model (Pink)

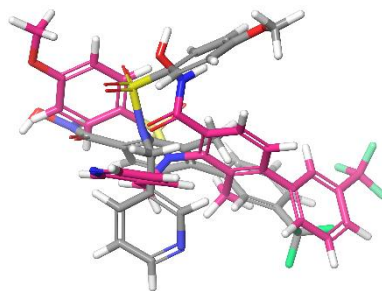

**Figure S9.** Represents superposition of conformations of inhibitor **5** best XP- docking pose (Grey) and pose of the pharmacophore model (Pink)

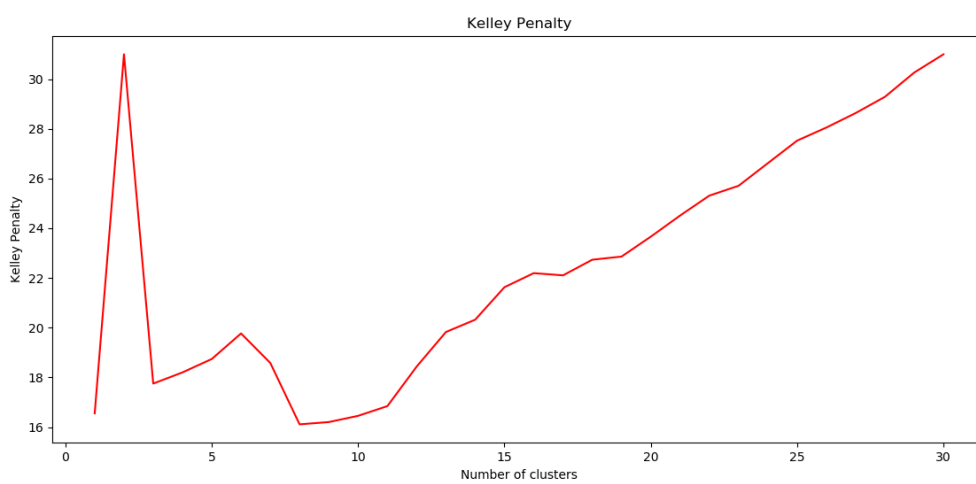

**Figure S10.** Represents a Kelley penalty plot against number of clusters.

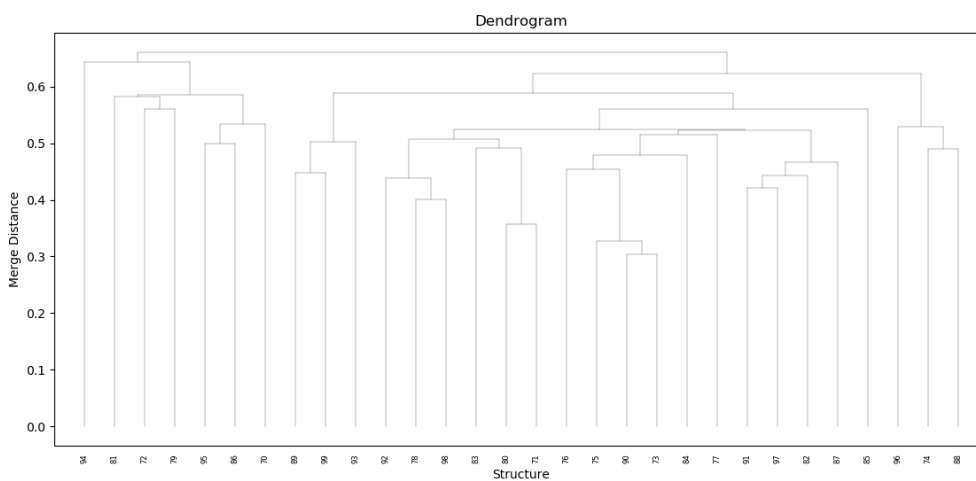

**Figure S11.** A dendrogram representing merging distances with reference to the cluster indices.

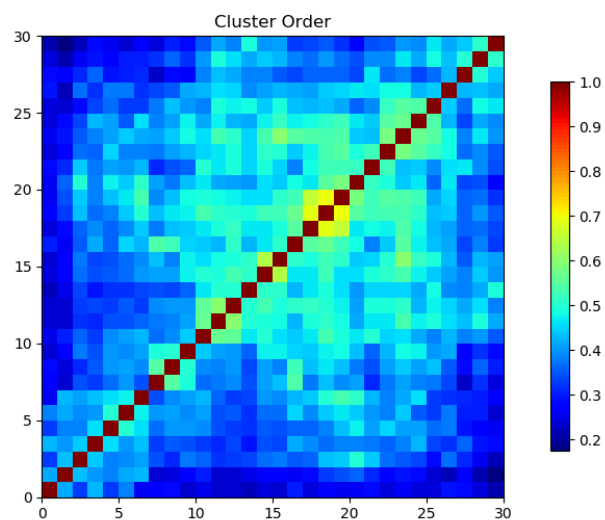

**Figure S12.** A distance matrix plot showing the dissimilarity between the clusters based on cluster order.

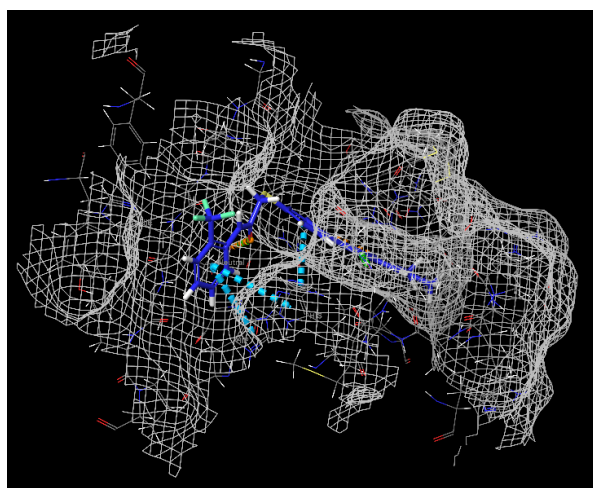

**Figure S13.** 3-dimensional diagram of virtual hit VH1 pose within the catalytic pocket of 5I12.

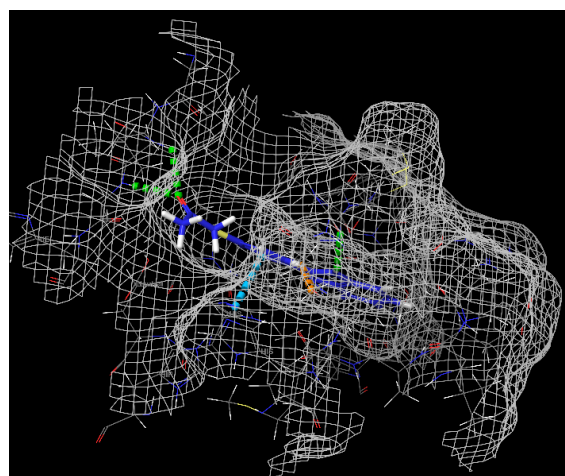

**Figure S14.** 3-dimensional diagram of virtual hit VH2 pose within the catalytic pocket of 5I12.

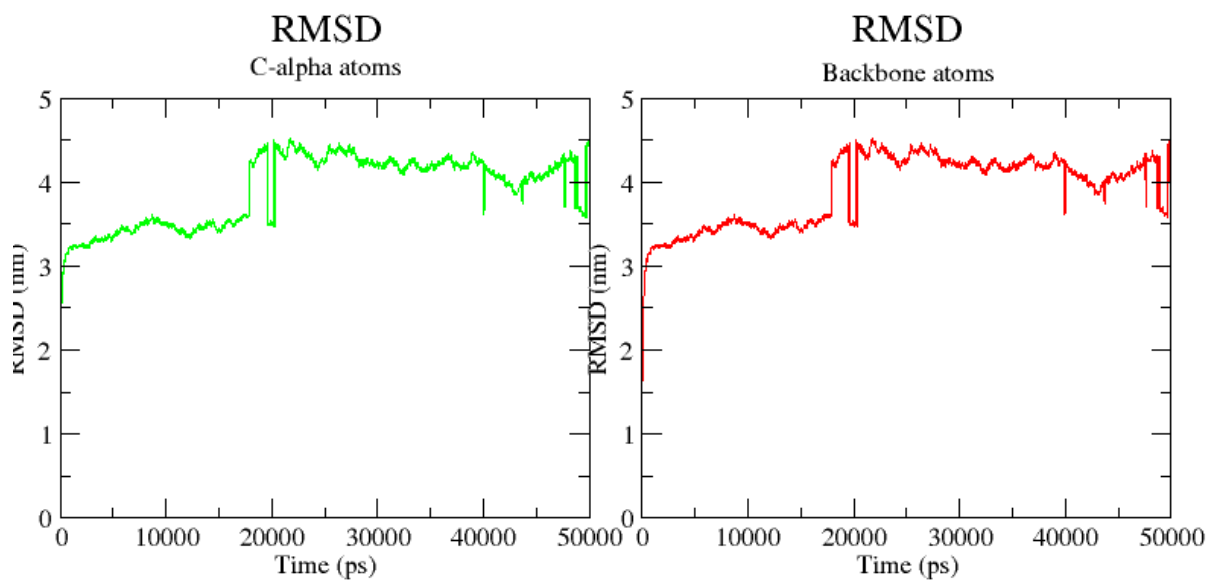

**Figure S15.** Represents RMSD ( $\text{\AA}$ ) of (a)  $C\alpha$  atoms of protein from those in initial structure (b) protein backbone from the initial structure of complex VH1/5I12 during MD simulation.

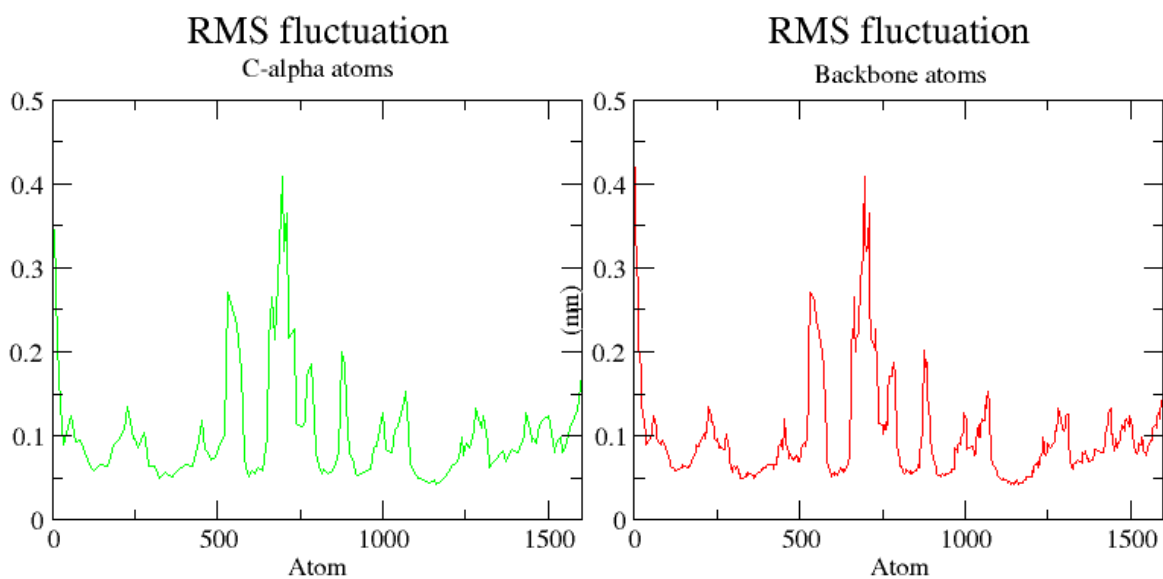

**Figure S16.** Represents RMSF ( $\text{\AA}$ ) of (a)  $C\alpha$  atoms of protein from those in initial structure (b) protein backbone from the initial structure of complex VH1/5I12 during MD simulation.

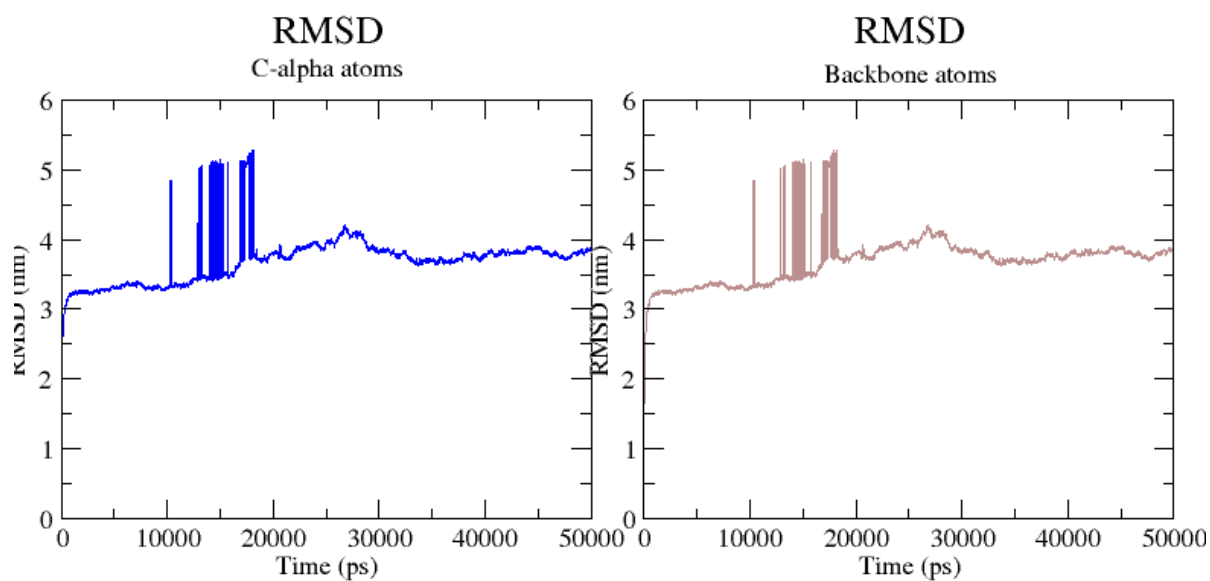

**Figure S17.** Represents RMSD ( $\text{\AA}$ ) of (a)  $C\alpha$  atoms of protein from those in initial structure (b) protein backbone from the initial structure of complex VH2/5I12 during MD simulation.

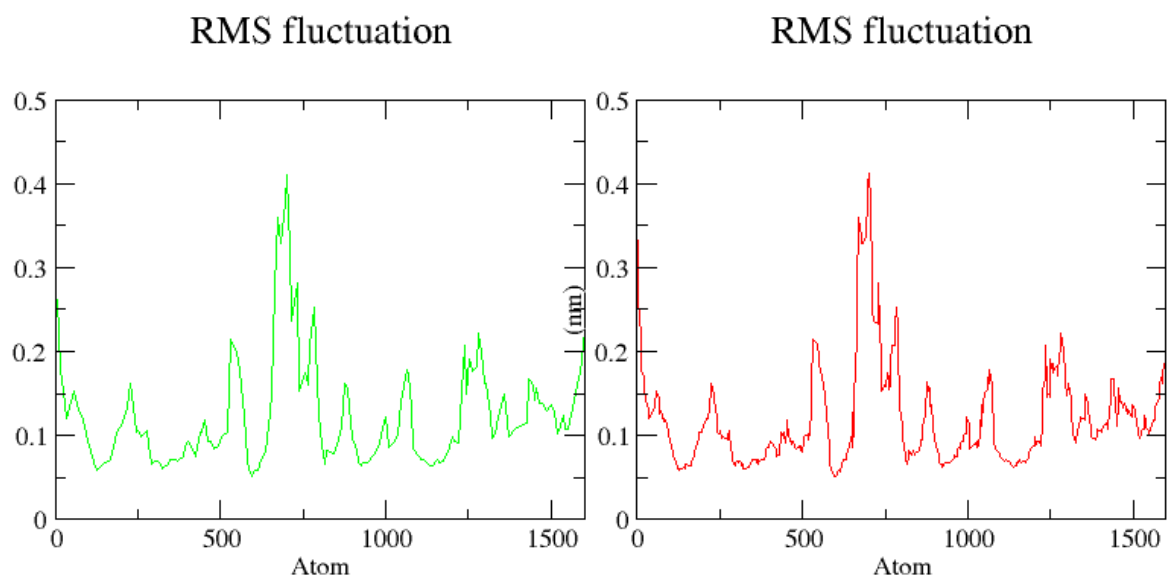

**Figure S18.** Represents RMSF ( $\text{\AA}$ ) of (a)  $C\alpha$  atoms of protein from those in initial structure (b) protein backbone from the initial structure of complex VH2/5I12 during MD simulation.
